# Supplementary figures and images for: Loading and Release of Anti -Cancer Drugs Using Simultaneous pH and Temperature Responsive Nanohybrid
Source: Research Square preprint supplement (doi:10.21203/rs.3.rs-123028/v1), 2020-12-14

**
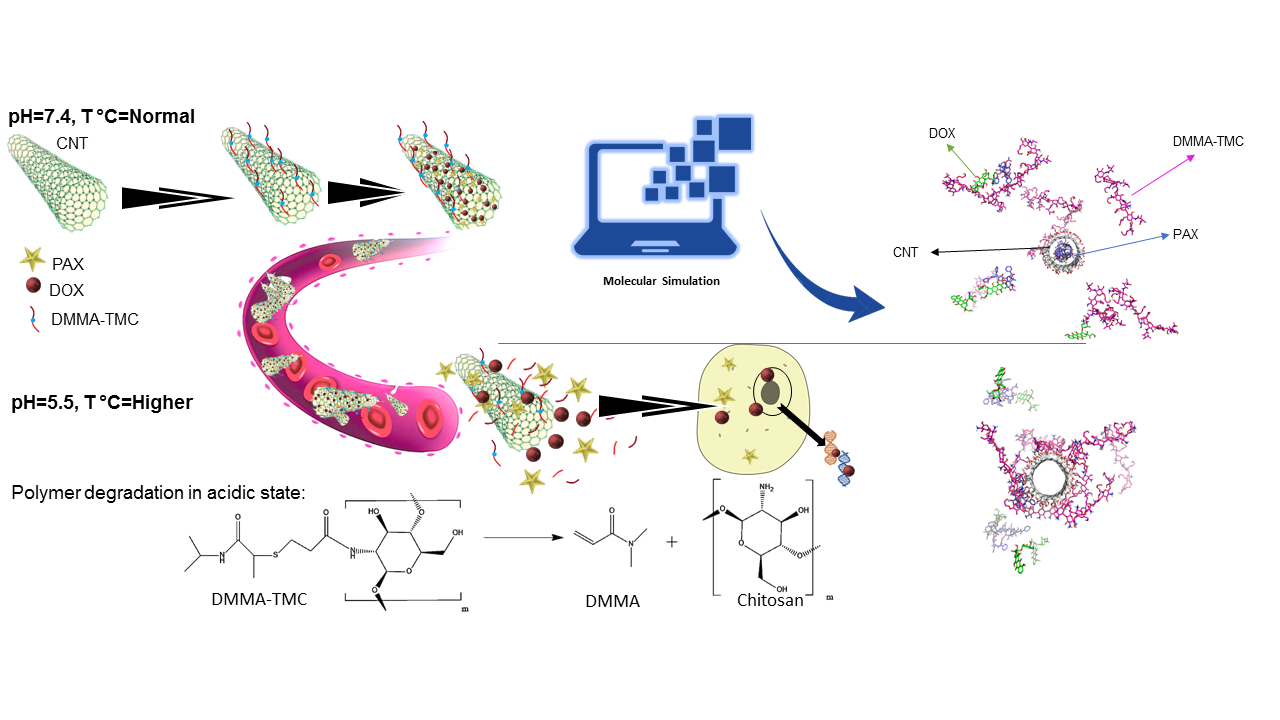
**

Supplement: Supplementary file 1 [file 1ab3d4800045ba6da3a184df.docx]
